# Supplementary figures and images for: Synthesis of Li4V(PO4)2F2 and 6,7Li NMR studies of its lithium ion dynamics
Source: Royal Society of Chemistry journal article supplement (doi:10.1039/b926838c), 2010-01-01

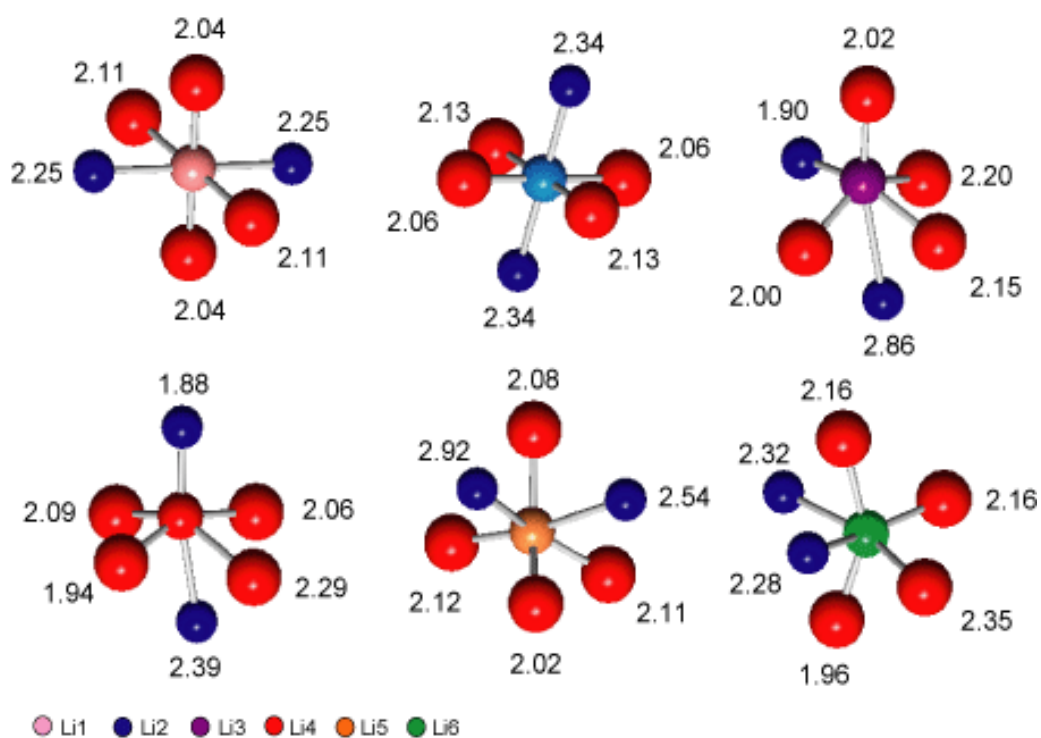

Supplement: b926838c.pdf [file b926838c.pdf]
